# Supplementary material for: A nanotherapeutic approach to selectively eliminate metastatic breast cancer cells by targeting cell surface GRP78
Source: Royal Society of Chemistry journal article supplement (doi:10.1039/d3nr00800b), 2023-01-01
Supplement: d3nr00800b1.pdf [file d3nr00800b1.pdf]

## Supporting Information

### **A nanotherapeutic approach to selectively eliminate metastatic breast cancer cells by targeting cell surface GRP78**

Jaeho Shin<sup>1,a</sup>, Baksun Kim<sup>1,a</sup>, Tyson W. Lager<sup>1,d,e,f</sup>, Franklin Mejia<sup>a</sup>, Ian Guldner<sup>b,d,g</sup>, Clay Conner<sup>d,e</sup>, Siyuan Zhang<sup>b,d</sup>, Athanasia D. Panopoulos<sup>b,d,e,\*</sup>, and Basar Bilgicer<sup>a,b,c,\*</sup>

<sup>a</sup>Department of Chemical and Biomolecular Engineering, University of Notre Dame, Notre Dame, IN 465567

<sup>b</sup>Harper Cancer Research Institute, University of Notre Dame, Notre Dame, IN 46556

<sup>c</sup>Berthiaume Institute for Precision Health, University of Notre Dame, Notre Dame, IN 46556

<sup>d</sup>Department of Biological Sciences, University of Notre Dame, Notre Dame, IN 46556

<sup>e</sup>Center for Stem Cells and Regenerative Medicine, University of Notre Dame, Notre Dame, IN 46556

<sup>f</sup>Present address: Division of Biology and Biological Engineering, California Institute of Technology, Pasadena, CA 91125.

<sup>g</sup>Present address: Department of Neurology and Neurological Sciences, Stanford University, Stanford, CA 94305.

<sup>1</sup>These authors contributed equally to this work and are co-first authors.

\*Corresponding Authors:

271 Galvin Life Sciences, Department of Biological Sciences, University of Notre Dame, Notre Dame, IN 46556, USA. E-mail address: [apanopou@nd.edu](mailto:apanopou@nd.edu) (A.D. Panopoulos)

205C McCourtney Hall, Department of Chemical and Biomolecular Engineering, University of Notre Dame, Notre Dame, IN 46556, USA. Email address: [bbilgicer@nd.edu](mailto:bbilgicer@nd.edu) (B. Bilgicer)

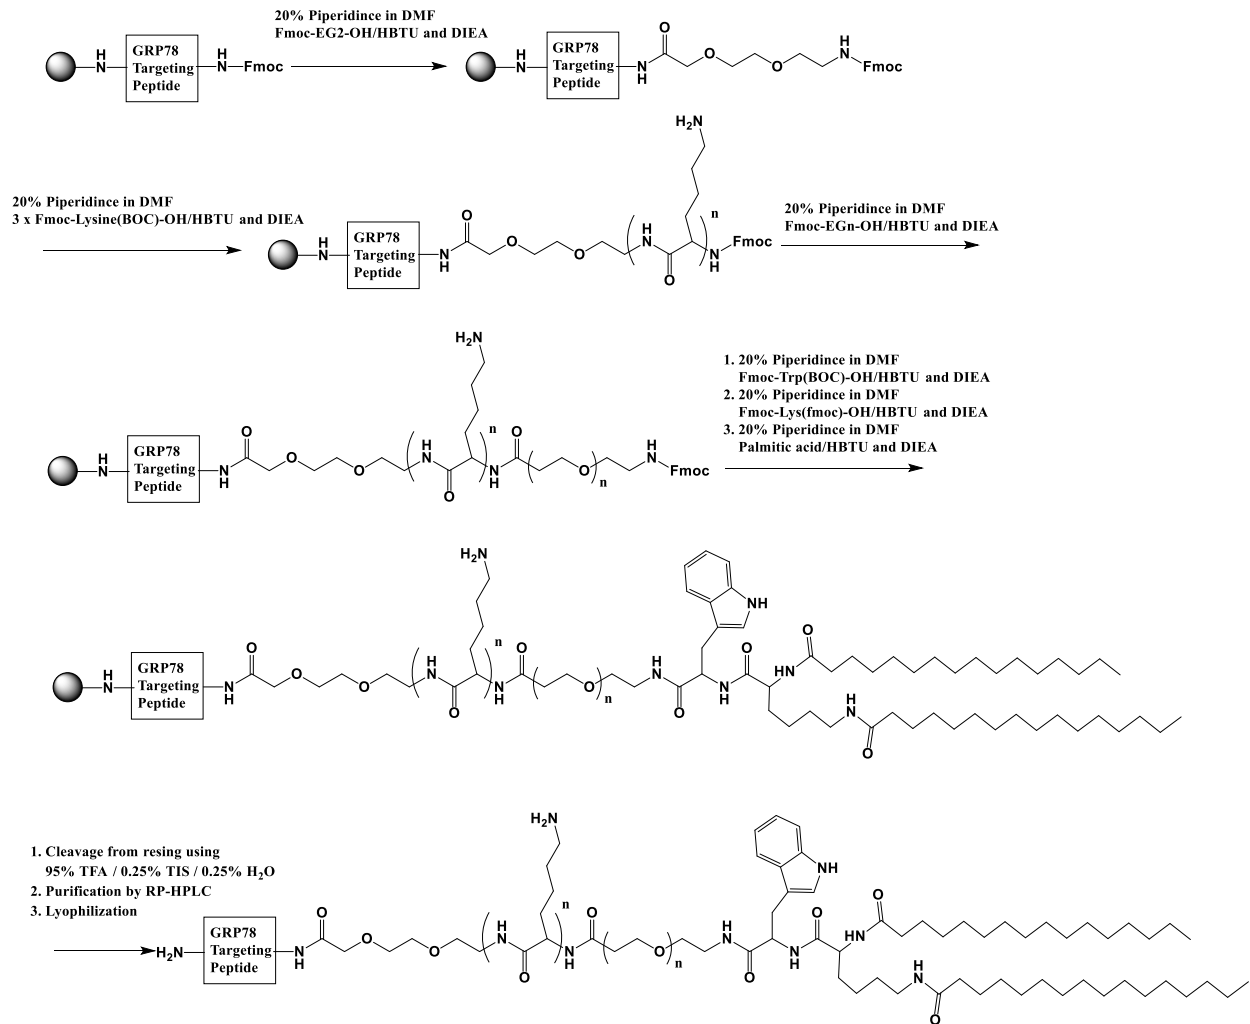

**Supplementary Figure 1.** Synthesizing steps for peptide lipid conjugates with various number of lysine conjugates and linker length.
